# Supplementary material for: Fast and selective cancer cell uptake of therapeutic gold nanorods by surface modifications with phosphorylcholine and Tat
Source: Royal Society of Chemistry journal article supplement (doi:10.1039/c2jm16713a), 2012-01-01
Supplement: c2jm16713a.pdf [file c2jm16713a.pdf]

## Electronic Supporting Information

### Fast and selective cancer cell uptake of therapeutic gold nanorods by surface modifications with phosphorylcholine and Tat

Wenbo Zhou, Xiangsheng Liu and Jian Ji\*

MOE Key Laboratory of Macromolecular Synthesis and Functionalization Department of Polymer Science and Engineering, Zhejiang University, Hangzhou 310027, China

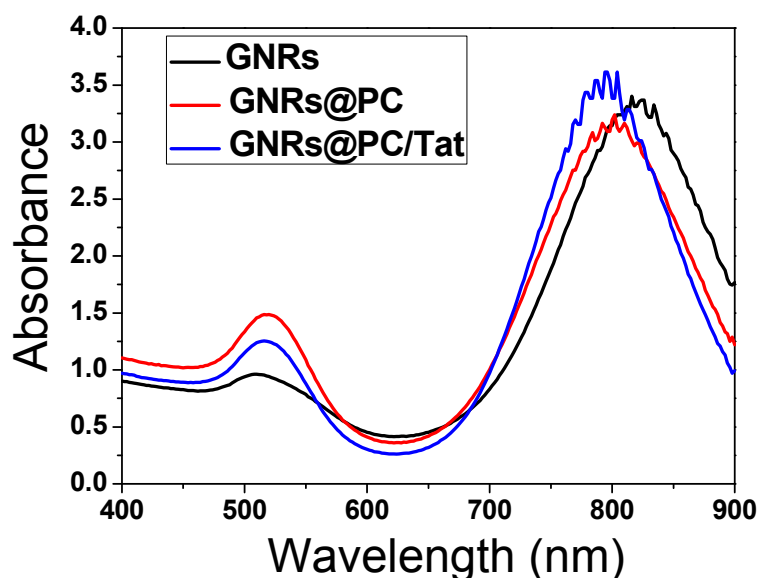

Figure S1. UV-Vis absorption spectra of prepared GNRs, GNRs@PC and GNRs@PC/Tat.

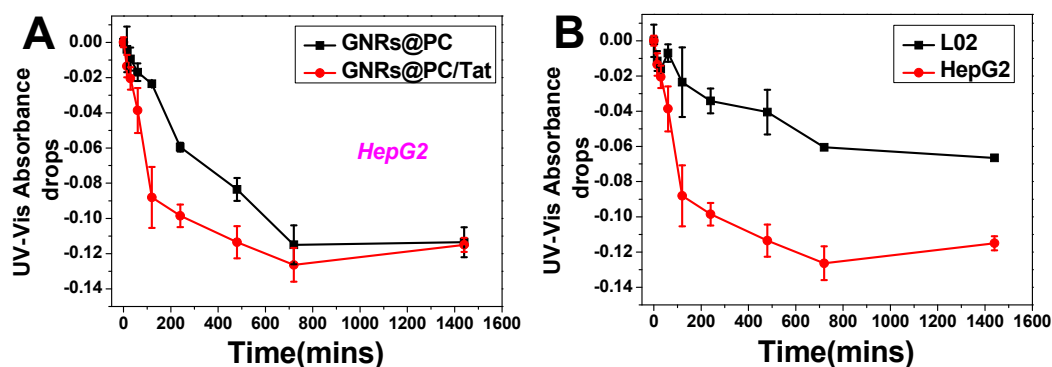

Figure S2. (A) UV-Vis results of the percentages of longitudinal peak absorbance of GNRs@PC and GNRs@PC/Tat left in the solutions around cells up to 24 hours interaction in HepG2. (B) UV-Vis results of the percentages of longitudinal peak absorbance of GNRs@PC/Tat left in the solutions around HepG2 and L02 cells up to 24 hours interaction. Data were presented as the mean  $\pm$  S.D. (n=3).
